# Supplementary material for: General Direct Anticancer Effects of Deer Growing Antler Extract in Several Tumour Cell Lines, and Immune System-Mediated Effects in Xenograft Glioblastoma
Source: MDPI journal article supplement (doi:10.3390/pharmaceutics16050610), 2024-04-30
Supplement: s1 [file s1]

# **Supplementary Materials for General Direct Anticancer Effects of Deer Growing Antler Extract in Several Tumour Cell Lines, and Immune System-Mediated Effects in Xenograft Glioblastoma**

Alessandra Rossetti *et al.*

Corresponding author: Tomás Landete Castillejos, [Tomas.Landete@uclm.es](mailto:Tomas.Landete@uclm.es)

**This PDF file includes the following:**

Figure S1,  
Figure S2,  
Figure S3,  
Table S1.

Figure S1. Mouse cytokine antibody array.

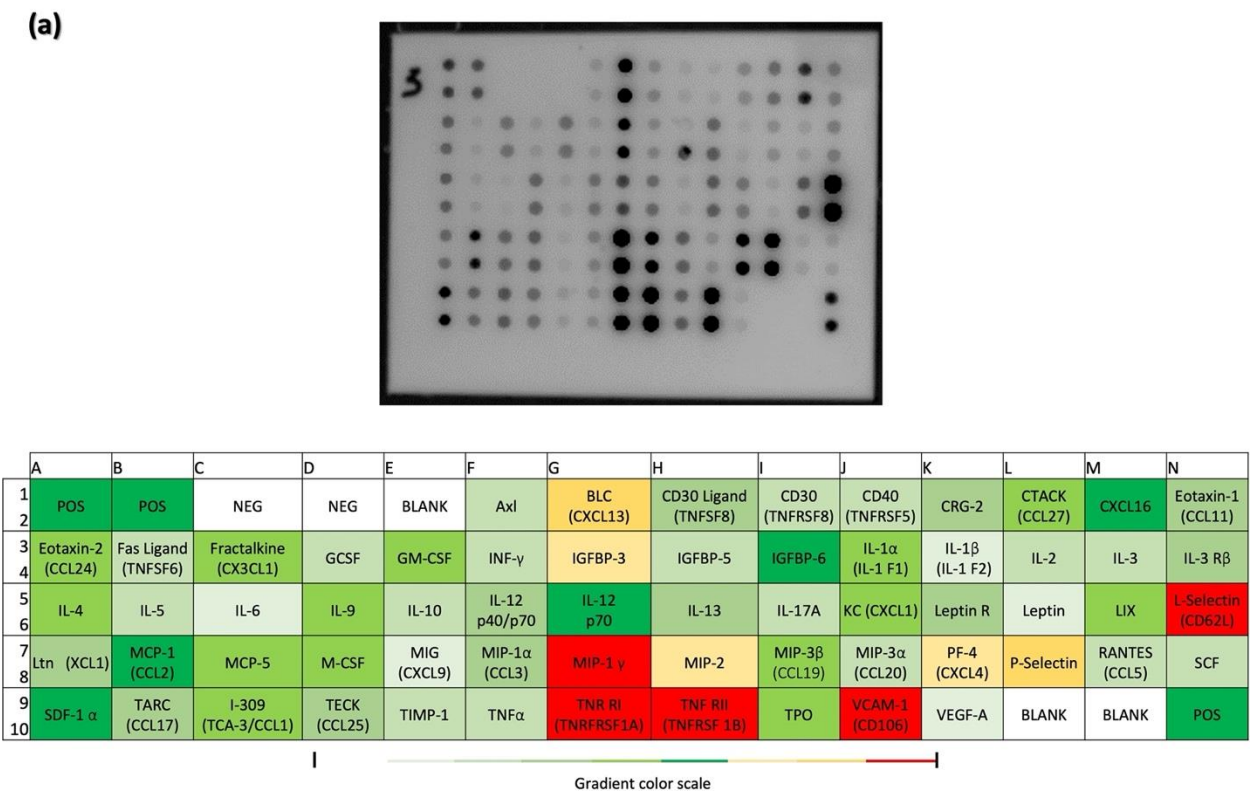

(b)

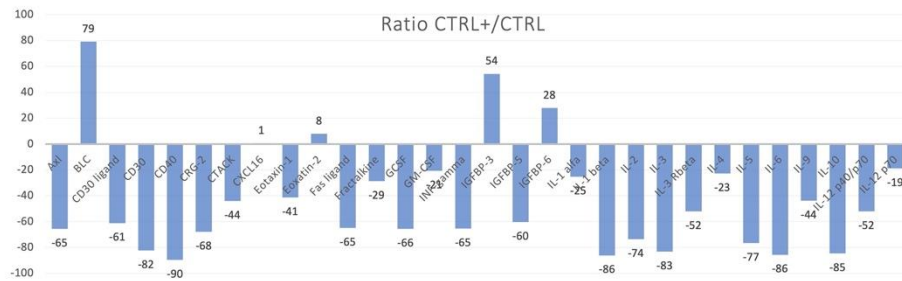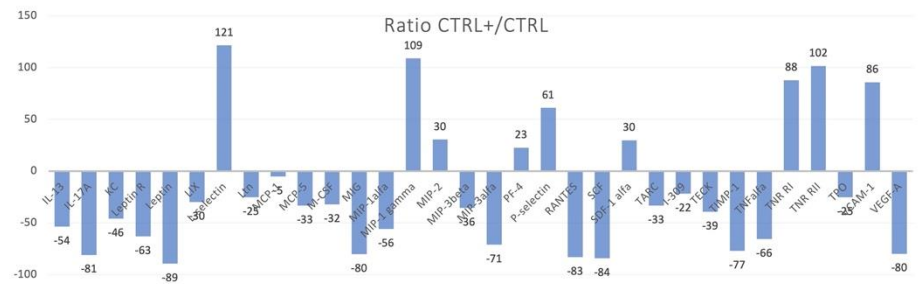

(c)

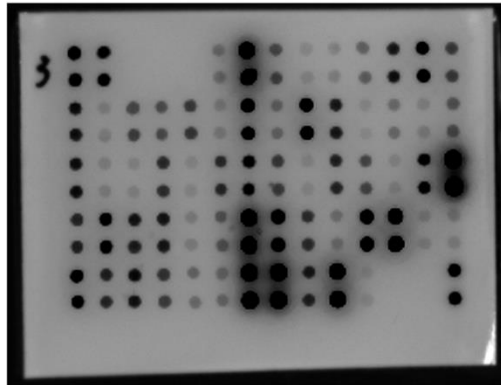

|    | A                 | B                   | C                    | D            | E           | F             | G                 | H                    | I              | J               | K               | L             | M             | N                  |
|----|-------------------|---------------------|----------------------|--------------|-------------|---------------|-------------------|----------------------|----------------|-----------------|-----------------|---------------|---------------|--------------------|
| 1  | POS               | POS                 | NEG                  | NEG          | BLANK       | Axl           | BLC (CXCL13)      | CD30 Ligand (TNFSF8) | CD30 (TNFRSF8) | CD40 (TNFRSF5)  | CRG-2           | CTACK (CCL27) | CXCL16        | Eotaxin-1 (CCL11)  |
| 2  |                   |                     |                      |              |             |               |                   |                      |                |                 |                 |               |               |                    |
| 3  | Eotaxin-2 (CCL24) | Fas Ligand (TNFSF6) | Fractalkine (CX3CL1) | G-CSF        | GM-CSF      | INF-γ         | IGFBP-3           | IGFBP-5              | IGFBP-6        | IL-1α (IL-1 F1) | IL-1β (IL-1 F2) | IL-2          | IL-3          | IL-3 Rβ            |
| 4  |                   |                     |                      |              |             |               |                   |                      |                |                 |                 |               |               |                    |
| 5  | IL-4              | IL-5                | IL-6                 | IL-9         | IL-10       | IL-12 p40/p70 | IL-12 p70         | IL-13                | IL-17A         | KC (CXCL1)      | Leptin R        | Leptin        | LIX           | L-Selectin (CD62L) |
| 6  |                   |                     |                      |              |             |               |                   |                      |                |                 |                 |               |               |                    |
| 7  | Ltn (XCL1)        | MCP-1 (CCL2)        | MCP-5                | M-CSF        | MIG (CXCL9) | MIP-1α (CCL3) | MIP-1 γ           | MIP-2                | MIP-3β (CCL19) | MIP-3α (CCL20)  | PF-4 (CXCL4)    | P-Selectin    | RANTES (CCL5) | SCF                |
| 8  |                   |                     |                      |              |             |               |                   |                      |                |                 |                 |               |               |                    |
| 9  | SDF-1 α           | TARC (CCL17)        | I-309 (TCA-3/CCL1)   | TECK (CCL25) | TIMP-1      | TNFα          | TNR RI (TNFRSF1A) | TNF RII (TNFRSF 1B)  | TPO            | VCAM-1 (CD106)  | VEGF-A          | BLANK         | BLANK         | POS                |
| 10 |                   |                     |                      |              |             |               |                   |                      |                |                 |                 |               |               |                    |

Gradient color scale

(d)

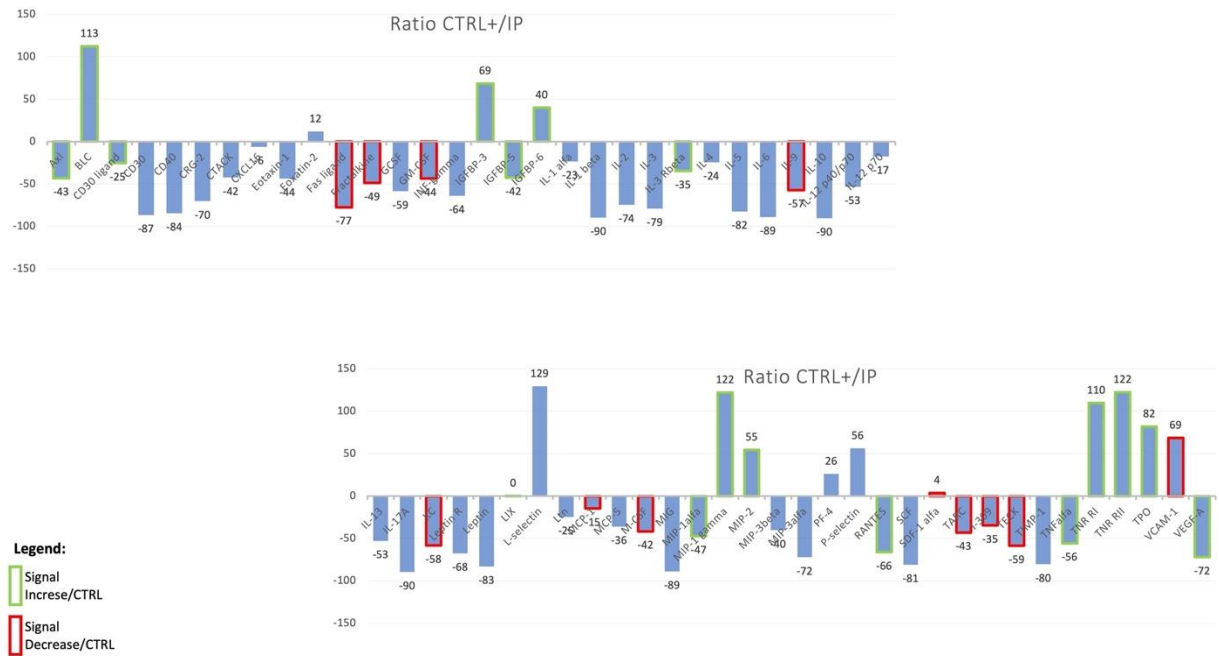

Figure S2. Images of scratch assay.

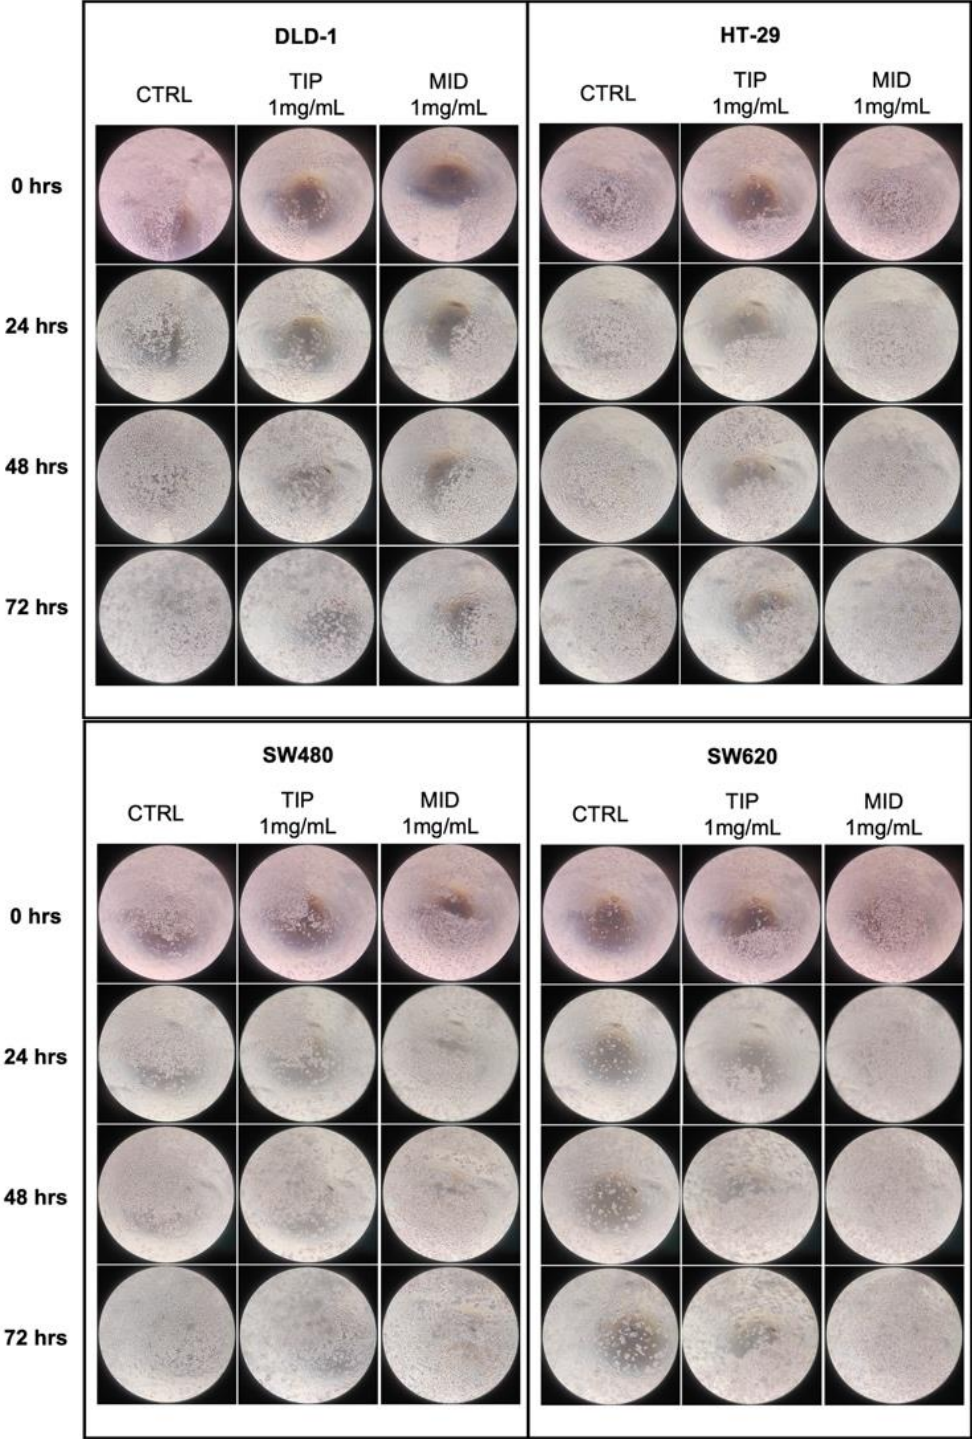



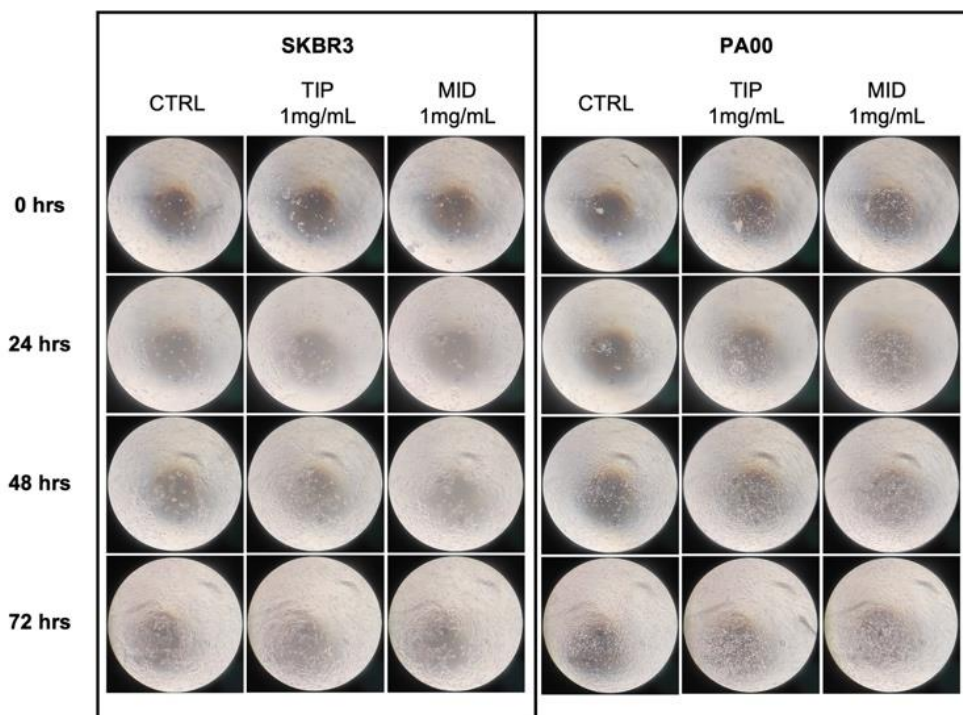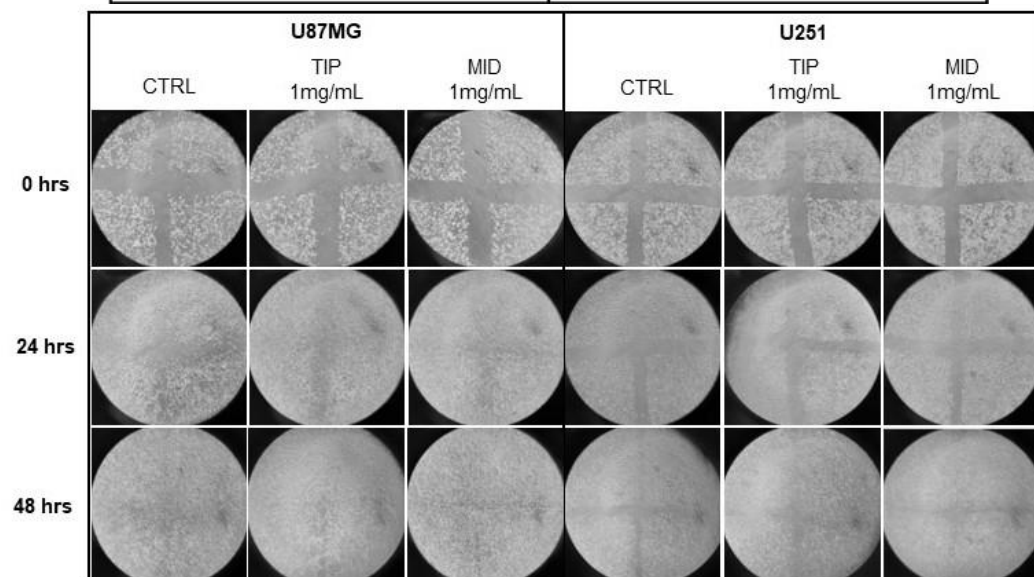

**Figure S3.** Images of xenograft tumours.

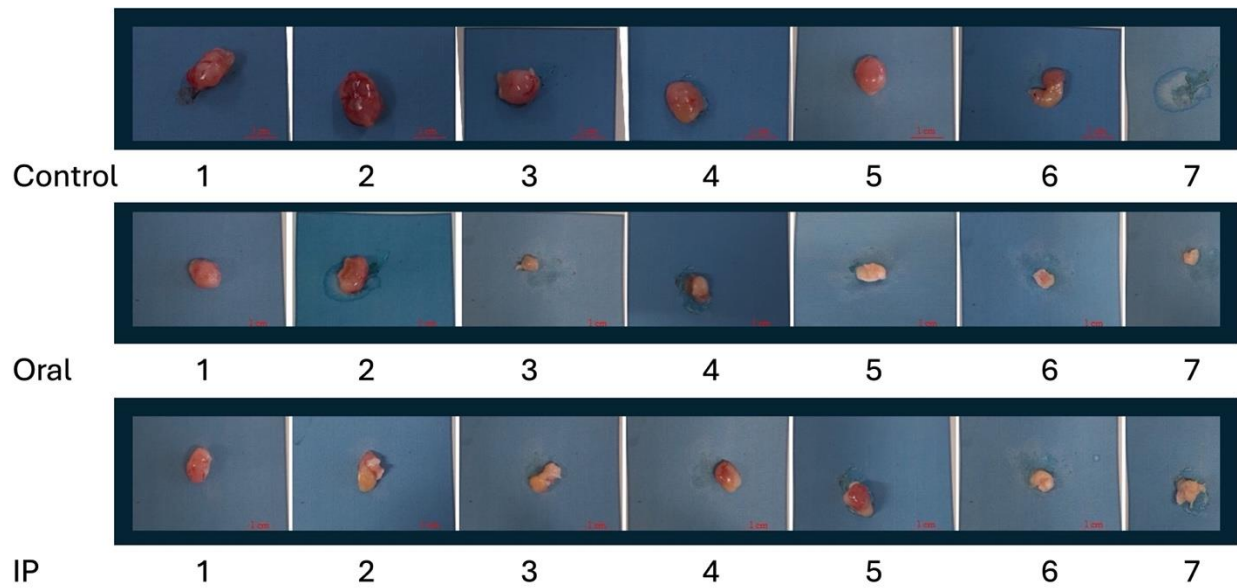

The tumours were removed after sacrifice and weighed for statistical comparison, which is shown in Figure 5 of the main text of the MS.

**Table S1.** List of functional annotations.

| Category         | Term                                                                                 | Count | %           | P-value     | Genes                                            | Fold Enrichment | Benjamini          | FDR         |
|------------------|--------------------------------------------------------------------------------------|-------|-------------|-------------|--------------------------------------------------|-----------------|--------------------|-------------|
| KEGG_PATHWAY     | mm00600-Cytokine-cytokine receptor interaction                                       | 11    | 91.66666667 | 1.17E-14    | IL10, CCL25, CD40, CSF2, IL5, CCL5, IL1B, LEP, F | 28.28795662     | <b>9.36E-13</b>    | 7.14E-13    |
| GOTERM_BP_DIRECT | GO:0005123-cytokine activity                                                         | 9     | 75          | 9.20E-14    | IL10, CCL25, CSF2, IL5, CCL5, IL1B, FASLG, CXCL  | 59.36170213     | <b>4.69E-12</b>    | 4.40E-12    |
| GOTERM_BP_DIRECT | GO:0006954-inflammatory response                                                     | 8     | 66.66666667 | 3.65E-10    | CCL25, CD40, IL5, AXL, CCL5, IL1B, CXCL1, IL1    | 33.44006651     | <b>1.69E-07</b>    | 1.56E-07    |
| GOTERM_BP_DIRECT | GO:0006955-immune response                                                           | 8     | 66.66666667 | 3.56E-09    | IL10, CCL25, CSF2, IL5, CCL5, IL1B, FASLG, CXCL  | 25.96662111     | <b>5.44E-07</b>    | 5.04E-07    |
| GOTERM_BP_DIRECT | GO:007134-cellular response to interleukin-1                                         | 5     | 41.66666667 | 8.26E-08    | CCL25, CD40, CCL5, CXCL1, IL17A                  | 102.326911      | <b>1.27E-05</b>    | 1.18E-05    |
| GOTERM_BP_DIRECT | GO:0042531-positive regulation of tyrosine phosphorylation of STAT protein           | 4     | 33.33333333 | 3.58E-06    | CD40, CSF2, CCL5, LEP                            | 17.65497708     | <b>4.40E-04</b>    | 3.75E-04    |
| GOTERM_BP_DIRECT | GO:0043491-protein kinase B signaling                                                | 4     | 33.33333333 | 5.21E-06    | CD40, AXL, CCL5, IL1B                            | 103.174559      | <b>4.82E-04</b>    | 4.46E-04    |
| GOTERM_BP_DIRECT | GO:0036939-neurotrophin chemotaxis                                                   | 4     | 33.33333333 | 1.05E-05    | CCL25, CCL5, IL1B, CXCL1                         | 81.7855285      | <b>8.10E-04</b>    | 7.50E-04    |
| GOTERM_BP_DIRECT | GO:0008264-positive regulation of cell proliferation                                 | 4     | 33.33333333 | 1.24E-05    | CSF2, IL5, IL1B, LEP, FASLG, CXCL1               | 15.79199172     | <b>8.15E-04</b>    | 7.55E-04    |
| KEGG_PATHWAY     | mm04672-cellular response to interferon gamma                                        | 4     | 33.33333333 | 1.63E-05    | IL10, CCL25, CD40, IL5                           | 69.85271318     | <b>6.51E-04</b>    | 4.96E-04    |
| KEGG_PATHWAY     | mm05121-Inflammatory bowel disease                                                   | 4     | 33.33333333 | 2.54E-05    | CCL25, CCL5, FASLG, CXCL1                        | 60.9666667      | <b>0.001467734</b> | 0.001359719 |
| KEGG_PATHWAY     | mm05130-Allograft rejection                                                          | 4     | 33.33333333 | 4.92E-05    | IL10, IL5, IL1B, IL17A                           | 48.44623606     | <b>0.001012802</b> | 7.88E-04    |
| GOTERM_BP_DIRECT | GO:0071350-cellular response to tumor necrosis factor                                | 4     | 33.33333333 | 5.16E-05    | IL10, CD40, IL5, FASLG                           | 47.6724808      | <b>0.001032802</b> | 7.88E-04    |
| GOTERM_BP_DIRECT | GO:0041112-positive regulation of IkappaB kinase/NF-kappaB signaling                 | 4     | 33.33333333 | 6.04E-05    | CCL25, CD40, CCL5, CXCL1                         | 45.62131519     | <b>0.001068789</b> | 0.002872675 |
| GOTERM_BP_DIRECT | GO:0048245-oncogenic chemotaxis                                                      | 3     | 25          | 8.80E-05    | CD40, IL1B, FASLG, CXCL1                         | 41.81234401     | <b>0.001434957</b> | 0.002912217 |
| KEGG_PATHWAY     | mm05120-Antimutagen thyroid disease                                                  | 3     | 25          | 8.77E-05    | CCL25, CCL5, CXCL1                               | 193.4519231     | <b>0.003683197</b> | 0.003412139 |
| GOTERM_BP_DIRECT | GO:0048020-CCR chemokine receptor binding                                            | 3     | 33.33333333 | 1.02E-04    | IL10, CD40, IL5, FASLG                           | 38.02109705     | <b>0.001627847</b> | 0.001341232 |
| GOTERM_BP_DIRECT | GO:0048247-lymphocyte chemotaxis                                                     | 3     | 25          | 1.03E-04    | CCL25, CCL5, CXCL1                               | 178.8401538     | <b>0.002614872</b> | 0.0025636   |
| GOTERM_BP_DIRECT | GO:0043544-positive regulation of GTPase activity                                    | 3     | 25          | 1.25E-04    | CCL25, CCL5, CXCL1                               | 16.25           | <b>0.004666953</b> | 0.004325907 |
| KEGG_PATHWAY     | mm00435-Rheumatoid arthritis                                                         | 3     | 25          | 1.31E-04    | CCL25, CD40, CCL5, CXCL1                         | 35.1109284      | <b>0.004666953</b> | 0.004325907 |
| GOTERM_BP_DIRECT | GO:001240-negative regulation of extrinsic apoptotic signaling pathway in absence of | 3     | 25          | 1.36E-04    | CSF2, CCL5, IL1B, IL17A                          | 34.52494521     | <b>0.007152469</b> | 0.006134351 |
| KEGG_PATHWAY     | mm04657-IL-1 signaling pathway                                                       | 3     | 25          | 1.51E-04    | CSF2, IL1B, CXCL1                                | 147.9338235     | <b>0.004983248</b> | 0.00461673  |
| KEGG_PATHWAY     | mm00567-IL-1 signaling pathway                                                       | 3     | 33.33333333 | 1.65E-04    | CSF2, IL5, IL1B, IL17A                           | 32.29749104     | <b>0.001761849</b> | 0.001343431 |
| KEGG_PATHWAY     | mm00601-Viral protein interaction with cytokine and cytokine receptor                | 3     | 25          | 1.79E-04    | IL10, CCL25, CCL5, CXCL1                         | 16.41745386     | <b>0.001761849</b> | 0.001343431 |
| GOTERM_BP_DIRECT | GO:0005248-oncogenic chemotaxis                                                      | 3     | 25          | 1.79E-04    | CCL25, CCL5, CXCL1                               | 135.931892      | <b>0.005516862</b> | 0.00511086  |
| KEGG_PATHWAY     | mm05142-Chagas disease                                                               | 4     | 33.33333333 | 2.24E-04    | IL10, CCL5, IL1B, FASLG                          | 29.1031232      | <b>0.001995288</b> | 0.001512504 |
| GOTERM_BP_DIRECT | GO:0070314-positive regulation of ERM1 and ERM2 cascade                              | 3     | 33.33333333 | 2.36E-04    | CCL25, CCL5, IL1B, CXCL1                         | 26.78254649     | <b>0.005516862</b> | 0.00511086  |
| GOTERM_BP_DIRECT | GO:0050796-regulation of insulin secretion                                           | 3     | 25          | 2.42E-04    | CCL5, IL1B, LEP                                  | 116.7093002     | <b>0.006516599</b> | 0.006037023 |
| GOTERM_BP_DIRECT | GO:0032725-positive regulation of interleukin-12 production                          | 3     | 25          | 2.42E-04    | CD40, LEP, IL17A                                 | 113.1312        | <b>0.005516599</b> | 0.005037023 |
| KEGG_PATHWAY     | mm04668-IL-1 signaling pathway                                                       | 3     | 33.33333333 | 2.48E-04    | CSF2, CCL5, CXCL1                                | 80.8113294      | <b>0.00235667</b>  | 0.001786189 |
| GOTERM_BP_DIRECT | GO:0008039-chemokine activity                                                        | 3     | 25          | 2.97E-04    | CCL25, CCL5, CXCL1                               | 105.6818182     | <b>0.005044808</b> | 0.004694589 |
| GOTERM_BP_DIRECT | GO:0030335-positive regulation of cell migration                                     | 4     | 33.33333333 | 3.56E-04    | CSF2, CCL5, IL1B, CXCL1                          | 23.02163184     | <b>0.008283015</b> | 0.007893279 |
| GOTERM_BP_DIRECT | GO:0070938-mediated signaling pathway                                                | 3     | 25          | 3.69E-04    | CCL25, CCL5, CXCL1                               | 94.8999414      | <b>0.008283015</b> | 0.007893279 |
| KEGG_PATHWAY     | mm05130-Asthma                                                                       | 3     | 25          | 4.00E-04    | IL10, CD40, IL5                                  | 90.11           | <b>0.002911111</b> | 0.002719722 |
| GOTERM_BP_DIRECT | GO:0046424-positive regulation of JAK-STAT cascade                                   | 3     | 25          | 4.73E-04    | IL10, IL5, LEP                                   | 83.82916667     | <b>0.004012802</b> | 0.003965740 |
| BIOCARTA         | in_cytokinePathway-The Role of Interleukin-10 in the Chemokine Network of Allergic   | 3     | 25          | 5.02E-04    | CSF2, IL5, IL1B, IL17A                           | 14.44444444     | <b>0.01586326</b>  | 0.014486514 |
| GOTERM_BP_DIRECT | GO:0032720-negative regulation of tumor necrosis factor production                   | 3     | 25          | 6.80E-04    | IL10, AXL, CXCL1                                 | 69.85763889     | <b>0.014286804</b> | 0.013234727 |
| GOTERM_BP_DIRECT | GO:0042102-positive regulation of cell proliferation                                 | 3     | 25          | 8.39E-04    | CCL5, IL1B, LEP                                  | 62.781875       | <b>0.005085202</b> | 0.004781547 |
| KEGG_PATHWAY     | mm01143-African trypanosomiasis                                                      | 3     | 25          | 8.80E-04    | IL10, IL1B, CXCL1                                | 57.7623051      | <b>0.006095315</b> | 0.005647677 |
| KEGG_PATHWAY     | mm00430-JAK-STAT signaling pathway                                                   | 4     | 33.33333333 | 9.00E-04    | IL10, CSF2, IL5, LEP                             | 17.56530214     | <b>0.006095315</b> | 0.005647677 |
| REACTOME_PATHWAY | R-MMU_380108-Chemokine receptors bind chemokines                                     | 3     | 25          | 0.001070486 | CCL25, CCL5, CXCL1                               | 52.7654231      | <b>0.005425285</b> | 0.049340987 |
| BIOCARTA         | in_cytokinePathway-Angiogenesis Dependent T Cell Activation                          | 3     | 25          | 0.001481335 | IL10, IL1B, CXCL1                                | 43.86666667     | <b>0.023318021</b> | 0.020529206 |
| GOTERM_BP_DIRECT | GO:0032735-positive regulation of interleukin-6 production                           | 3     | 25          | 0.001606077 | IL1B, LEP, IL17A                                 | 45.31306306     | <b>0.030916964</b> | 0.02864170  |
| KEGG_PATHWAY     | mm05147-Lipid and atherosclerosis                                                    | 4     | 33.33333333 | 0.001943993 | CD40, CCL5, IL1B, FASLG                          | 13.989642       | <b>0.001188504</b> | 0.00470257  |
| KEGG_PATHWAY     | mm05144-Malaria                                                                      | 25    | 208.3333333 | 0.002053611 | IL10, IL5, IL1B                                  | 39.52179282     | <b>0.011117485</b> | 0.010617667 |
| GOTERM_BP_DIRECT | GO:0051091-positive regulation of sequence-specific DNA binding transcription factor | 3     | 25          | 0.002222666 | IL10, IL5, IL1B                                  | 38.39503817     | <b>0.00164665</b>  | 0.017308824 |
| GOTERM_BP_DIRECT | GO:0051097-positive regulation of protein kinase B signaling                         | 3     | 25          | 0.002360349 | AXL, LEP, CXCL1                                  | 38.10416667     | <b>0.00164665</b>  | 0.017308824 |
| GOTERM_BP_DIRECT | GO:0009135-chemotaxis                                                                | 3     | 25          | 0.003793993 | IL10, IL1B, CXCL1                                | 36.9845558      | <b>0.01149171</b>  | 0.010793816 |
| GOTERM_BP_DIRECT | GO:0050999-regulation of nitric-oxide synthase activity                              | 2     | 16.66666667 | 0.003731078 | IL1B, LEP                                        | 67.06333333     | <b>0.045061794</b> | 0.041345558 |
| KEGG_PATHWAY     | mm05163-Human cytomegalovirus infection                                              | 4     | 33.33333333 | 0.003151271 | CCL5, IL1B, FASLG, CXCL1                         | 11.7373092      | <b>0.005780553</b> | 0.021207094 |
| GOTERM_BP_DIRECT | GO:0019211-cytokine-mediated signaling pathway                                       | 25    | 208.3333333 | 0.003297769 | IL5, IL1B, CXCL1                                 | 114.559375      | <b>0.009755738</b> | 0.009409554 |
| GOTERM_BP_DIRECT | GO:0045576-positive regulation of angiogenesis                                       | 3     | 25          | 0.003297769 | CD40, CCL5, IL1B                                 | 31.4539375      | <b>0.009755738</b> | 0.009409554 |
| GOTERM_BP_DIRECT | GO:0045944-positive regulation of transcription from RNA polymerase II promoter      | 5     | 41.66666667 | 0.003338096 | IL10, CD40, IL1B, CXCL1, IL17A                   | 6.76041667      | <b>0.009755738</b> | 0.009409554 |
| GOTERM_BP_DIRECT | GO:0051091-positive regulation of transcription factor activity                      | 3     | 25          | 0.003432035 | IL10, IL5, IL1B                                  | 39.52179282     | <b>0.004758186</b> | 0.02864170  |
| GOTERM_BP_DIRECT | GO:0051092-positive regulation of NF-kappaB transcription factor activity            | 3     | 25          | 0.003503541 | CD40, IL1B, CXCL1                                | 30.48333333     | <b>0.005056706</b> | 0.04664860  |
| GOTERM_BP_DIRECT | GO:0010625-positive regulation of fever generation                                   | 2     | 16.66666667 | 0.003821525 | CCL5, IL1B                                       | 47.93238095     | <b>0.005192782</b> | 0.048106257 |
| GOTERM_BP_DIRECT | GO:0012744-positive regulation of interleukin-23 production                          | 3     | 16.66666667 | 0.003821525 | CCL5, IL17A                                      | 79.03238095     | <b>0.005192782</b> | 0.048106257 |
| GOTERM_BP_DIRECT | GO:0043006-negative regulation of apoptosis                                          | 4     | 33.33333333 | 0.004761285 | IL10, AXL, LEP, CXCL1                            | 10.16111111     | <b>0.006284895</b> | 0.005822271 |
| KEGG_PATHWAY     | mm04640-Hematopoietic cell lineage                                                   | 3     | 25          | 0.005573035 | CSF2, IL5, IL1B                                  | 22.9642553      | <b>0.02611929</b>  | 0.019969505 |
| GOTERM_BP_DIRECT | GO:0030434-negative regulation of vascoconstriction                                  | 3     | 25          | 0.005952867 | LEP, CXCL1, CXCL1                                | 43.81333333     | <b>0.027999664</b> | 0.02611929  |
| KEGG_PATHWAY     | mm04620-Toll like receptor signaling pathway                                         | 3     | 25          | 0.006282703 | CD40, CCL5, IL1B                                 | 22.5275         | <b>0.027923124</b> | 0.021291382 |
| KEGG_PATHWAY     | mm04607-T cell receptor signaling pathway                                            | 3     | 25          | 0.00665397  | IL10, CSF2, IL5                                  | 21.8713922      | <b>0.028016716</b> | 0.021367240 |
| BIOCARTA         | in_cytokinePathway-Cytokine Network                                                  | 3     | 25          | 0.007067495 | IL10, IL5, IL1B, IL17A                           | 69.41239841     | <b>0.007381494</b> | 0.006290272 |
| GOTERM_BP_DIRECT | GO:0071803-positive regulation of podosome assembly                                  | 2     | 16.66666667 | 0.007086446 | CSF2, IL5                                        | 257.9338074     | <b>0.008486958</b> | 0.007974097 |
| KEGG_PATHWAY     | mm05146-Anemia/hem                                                                   | 3     | 25          | 0.007164336 | IL10, CSF2, IL5                                  | 21.05737832     | <b>0.028057343</b> | 0.021851224 |
| GOTERM_BP_DIRECT | GO:0042573-chemokine receptor binding                                                | 3     | 16.66666667 | 0.007663414 | CCL25, CCL5, CXCL1                               | 35.8451538      | <b>0.027368562</b> | 0.026174414 |
| GOTERM_BP_DIRECT | GO:0070328-dendritic cell differentiation                                            | 3     | 16.66666667 | 0.008713405 | CSF2, AXL                                        | 209.5729167     | <b>0.030363888</b> | 0.005750202 |
| GOTERM_BP_DIRECT | GO:0001934-positive regulation of protein phosphorylation                            | 3     | 25          | 0.008725524 | CD40, IL1B, LEP                                  | 10.58203333     | <b>0.030363888</b> | 0.005750202 |
| BIOCARTA         | in_cytokinePathway-Cytokines and Inflammatory Responses                              | 3     | 25          | 0.009121388 | IL10, IL5, IL1B, IL17A                           | 16.48717949     | <b>0.030628621</b> | 0.02864170  |
| GOTERM_BP_DIRECT | GO:0071232-cellular response to lipopolysaccharide                                   | 3     | 25          | 0.01115226  | IL10, IL1B, IL17A                                | 16.76833333     | <b>0.128737964</b> | 0.119263491 |
| GOTERM_BP_DIRECT | GO:0020035-positive regulation of endothelial cell apoptotic process                 | 2     | 16.66666667 | 0.01142474  | CD40, FASLG                                      | 159.6746032     | <b>0.128774964</b> | 0.119263491 |
| REACTOME_PATHWAY | R-MMU_375276-Tyrosine ligand-binding receptor                                        | 3     | 25          | 0.012094035 | CCL25, CCL5, CXCL1                               | 13.8189962      | <b>0.296381874</b> | 0.285001804 |
| KEGG_PATHWAY     | mm05156-Alcoholic liver disease                                                      | 3     | 25          | 0.01218847  | IL1B, FASLG, IL17A                               | 15.97695035     | <b>0.046437513</b> | 0.035480604 |
| GOTERM_BP_DIRECT | GO:0010759-positive regulation of macrophage chemotaxis                              | 2     | 16.66666667 | 0.015897419 | CCL5, CXCL1                                      | 134.2266667     | <b>0.149404414</b> | 0.138462742 |
| KEGG_PATHWAY     | mm05155-Non-alcoholic fatty liver disease                                            | 3     | 25          | 0.016747632 | IL10, IL1B, FASLG                                | 14.44070513     | <b>0.005375734</b> | 0.004800859 |
| GOTERM_BP_DIRECT | GO:0002676-positive regulation of immunoglobulin production                          | 2     | 16.66666667 | 0.016284878 | IL10, IL5                                        | 111.7722222     | <b>0.172719465</b> | 0.160088059 |
| GOTERM_BP_DIRECT | GO:1900745-positive regulation of p38MAPK cascade                                    | 2     | 16.66666667 | 0.021632325 | IL1B, LEP                                        | 108.1666667     | <b>0.172719465</b> | 0.160088059 |
| GOTERM_BP_DIRECT | GO:0059040-basophilic migration                                                      | 3     | 16.66666667 | 0.021632325 | IL10, IL5, IL1B                                  | 108.1666667     | <b>0.172719465</b> | 0.160088059 |
| KEGG_PATHWAY     | mm05164-Influenza A                                                                  | 3     | 25          | 0.01799748  | CCL5, IL1B, FASLG                                | 13.016763       | <b>0.005651409</b> | 0.004730526 |
| GOTERM_BP_DIRECT | GO:0014344-response to interferon gamma                                              | 2     | 16.66666667 | 0.04317655  | CD40, CCL5                                       | 96.62249002     | <b>0.1812821</b>   | 0.167900352 |
| GOTERM_BP_DIRECT | GO:0045621-positive regulation of coelomic differentiation                           | 2     | 16.66666667 | 0.04317655  | CCL5, IL1B                                       | 96.62249002     | <b>0.1812821</b>   | 0.167900352 |
| GOTERM_BP_DIRECT | GO:0010934-macrophage cytokine production                                            | 2     | 16.66666667 | 0.030405976 | AXL, IL1B                                        | 90.62612133     | <b>0.192377173</b> | 0.17873579  |
| GOTERM_BP_DIRECT | GO:0030106-platelet activation                                                       | 2     | 16.66666667 | 0.031122851 | AXL, CXCL1                                       | 85.97863248     | <b>0.199158329</b> | 0.184048055 |
| GOTERM_BP_DIRECT | GO:0042825-defense response to protozoan                                             | 2     | 16.66666667 | 0.031659911 | IL10, CD40                                       | 81.82916667     | <b>0.200129996</b> | 0.185481018 |
| KEGG_PATHWAY     | mm05062-Chemokine signaling pathway                                                  | 3     | 25          | 0.021889495 | CCL25, CCL5, CXCL1                               | 11.7373092      | <b>0.072962884</b> | 0.055053801 |
| GOTERM_BP_DIRECT | GO:0008118-negative regulation of cytokine production                                | 2     | 16.66666667 | 0.022195901 | IL10, AXL                                        | 81.7855285      | <b>0.20100414</b>  | 0.186384433 |
| GOTERM_BP_DIRECT | GO:0012889-negative regulation of interferon-gamma production                        | 2     | 16.66666667 | 0.022370764 | IL10, AXL                                        | 79.83730159     | <b>0.201058099</b> | 0.187891676 |
| GOTERM_BP_DIRECT | GO:0031663-lipopolysaccharide-mediated signaling pathway                             | 2     | 16.66666667 | 0.023260201 | CCL5, IL1B                                       | 77.98026104     | <b>0.202811036</b> | 0.18785548  |
| GOTERM_BP_DIRECT | GO:0043056-chemotactant activity                                                     | 2     | 16.66666667 | 0.024404949 | CCL5, CXCL1                                      | 72.5            | <b>0.198979979</b> | 0.195078411 |
| GOTERM_BP_DIRECT | GO:0010957-negative regulation of anaphage                                           | 2     | 16.66666667 | 0.024879911 | IL1B, LEP                                        | 62.11784662     | <b>0.172719465</b> | 0.167900352 |
| REACTOME_PATHWAY | R-MMU_418594-G alpha (i) signaling events                                            | 3     | 25          | 0.025227851 | CCL25, CCL5, CXCL1                               | 10.39902676     | <b>0.030563097</b> | 0.02864170  |
|                  |                                                                                      |       |             |             |                                                  |                 |                    |             |
